# Supplementary material
Source: publisher figshare collection journal article supplement (https://acs.figshare.com/ndownloader/files/22891037)
Supplement: Supplementary file 1 [file 22891037]

--Supporting Information--

# Dry Pressing Neat Active Materials into Ultrahigh Mass Loading Sandwich Cathodes Enabled by Holey Graphene Scaffold

*Christian O. Plaza-Rivera, Brandon A. Walker, Nam X. Tran, Rocco P. Viggiano, Donald A. Dornbusch, James J. Wu, John W. Connell,\* and Yi Lin\**

Email: [yi.lin-1@nasa.gov](mailto:yi.lin-1@nasa.gov); [john.w.connell@nasa.gov](mailto:john.w.connell@nasa.gov)

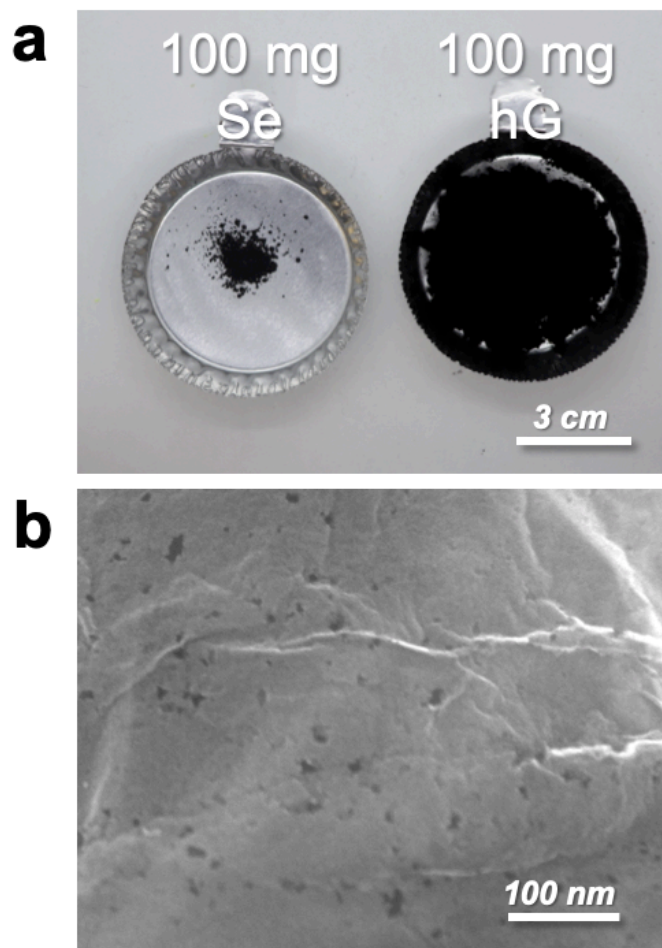

**Figure S1.** (a) Photograph of 100 mg Se powder and 100 mg hG powder. (b) A typical SEM image of a hG sheet.

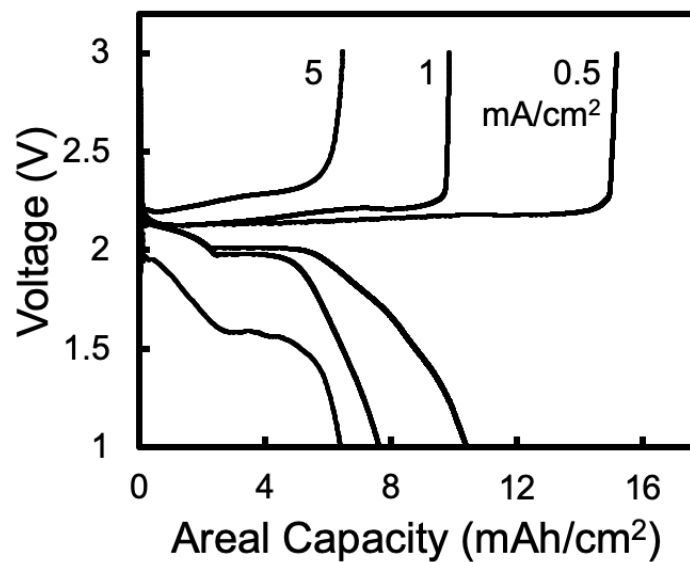

**Figure S2.** Areal capacity performances from the first discharge and the first charge of three identical Li-Se batteries ( $m_{\text{Se}} = 17.3 \text{ mg/cm}^2$ ,  $\text{Se}\% \sim 75 \text{ wt}\%$ ) ran at 0.5, 1, and 5  $\text{mA/cm}^2$ , respectively, in the voltage window of 1 – 3 V. This is the same set of data shown in Figure 2c but only with the x-axis converted into areal capacity.

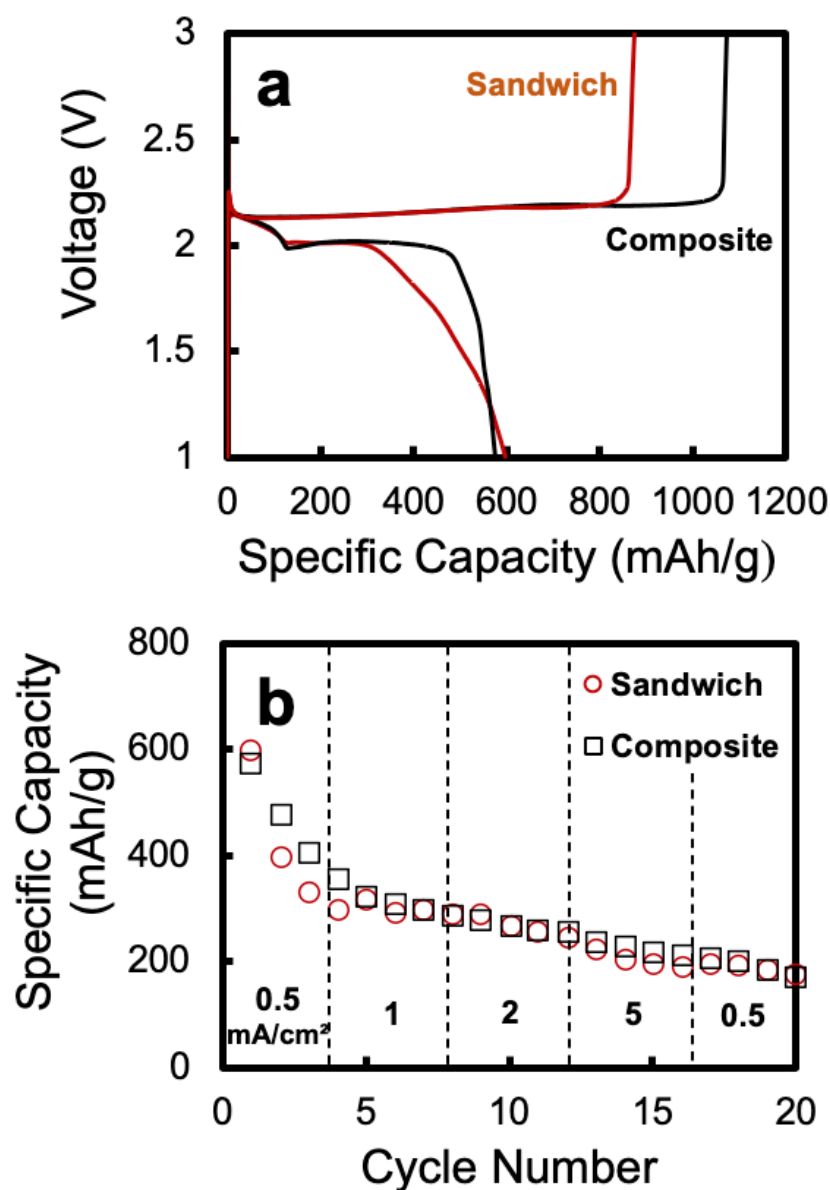

**Figure S3.** Performance comparison of Li-Se batteries with a hG/Se/hG sandwich cathode vs a hG/Se composite cathode where hG and Se powders were pre-mixed: (a) the first discharge and the first charge curves; (b) specific capacity change at different current densities of 0.5, 1, 2, 5, and 0.5 mA/cm<sup>2</sup>. The total mass of the active material layer were kept the same (30 mg), so that their Se mass loadings and Se contents were slightly different (sandwich:  $m_{\text{Se}} = 17.3 \text{ mg/cm}^2$ , Se%  $\sim 75 \text{ wt\%}$ ; composite:  $m_{\text{Se}} = 15.6 \text{ mg/cm}^2$ , Se%  $\sim 90 \text{ wt\%}$ ).

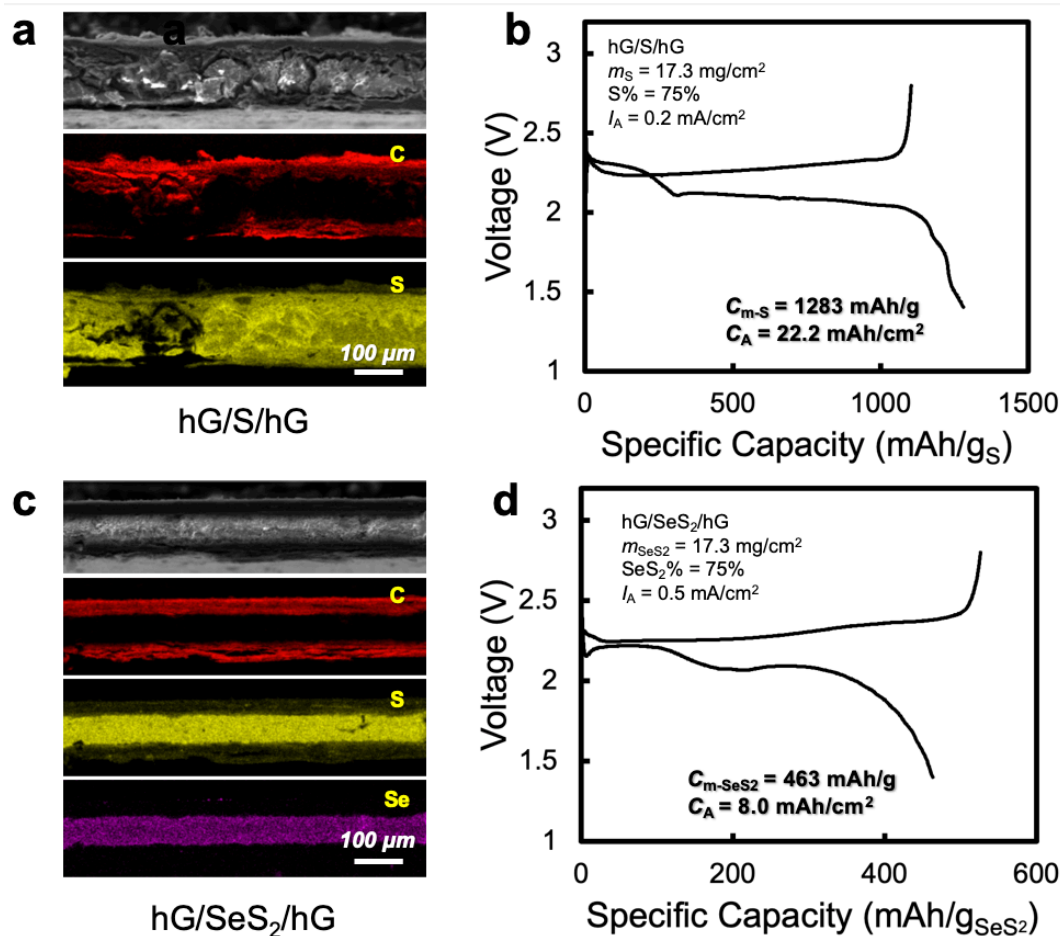

**Figure S4.** hG-enabled sandwich electrodes with (a,b) S and (c,d) SeS<sub>2</sub> as the active material, respectively. (a,c) are the SEM and the corresponding elemental maps of the electrode cross-section. (b,d) are the first discharge and the first charge curves of batteries made with the corresponding sandwich electrode. The electrode characteristics and measurement parameters are specified on each plot.  $m_{\text{S}}$ : S mass loading;  $m_{\text{SeS}_2}$ : SeS<sub>2</sub> mass loading;  $C_{\text{m-S}}$  and  $C_{\text{m-SeS}_2}$ : specific capacity based on the weight of S and SeS<sub>2</sub>, respectively;  $C_{\text{A}}$ : areal capacity;  $I_{\text{A}}$ : areal current density.

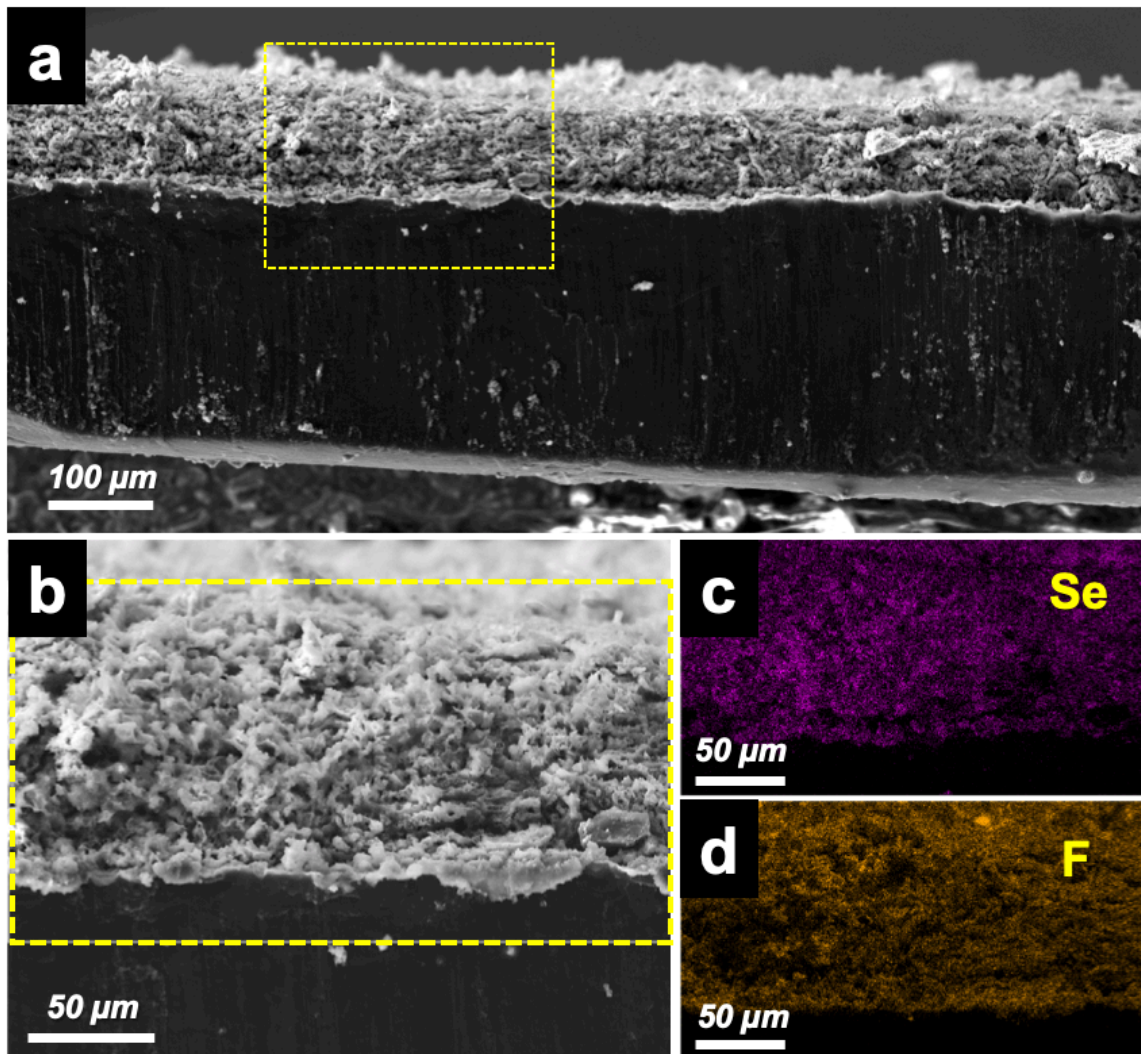

**Figure S5.** (a) A typical SEM image of cross-section of the Li anode of the Li-Se battery with the hG/Se/hG sandwich cathode ( $m_{\text{Se}} = 17.3 \text{ mg/cm}^2$ , Se%  $\sim 75 \text{ wt\%}$ ) after the first discharge (1 D). (b) A magnified view from the area highlighted in (a). (c) Se and (d) F map from EDS analyses of the area highlighted in (b). F element is an indication of SEI as it originated from the electrolyte (LiTFSI).

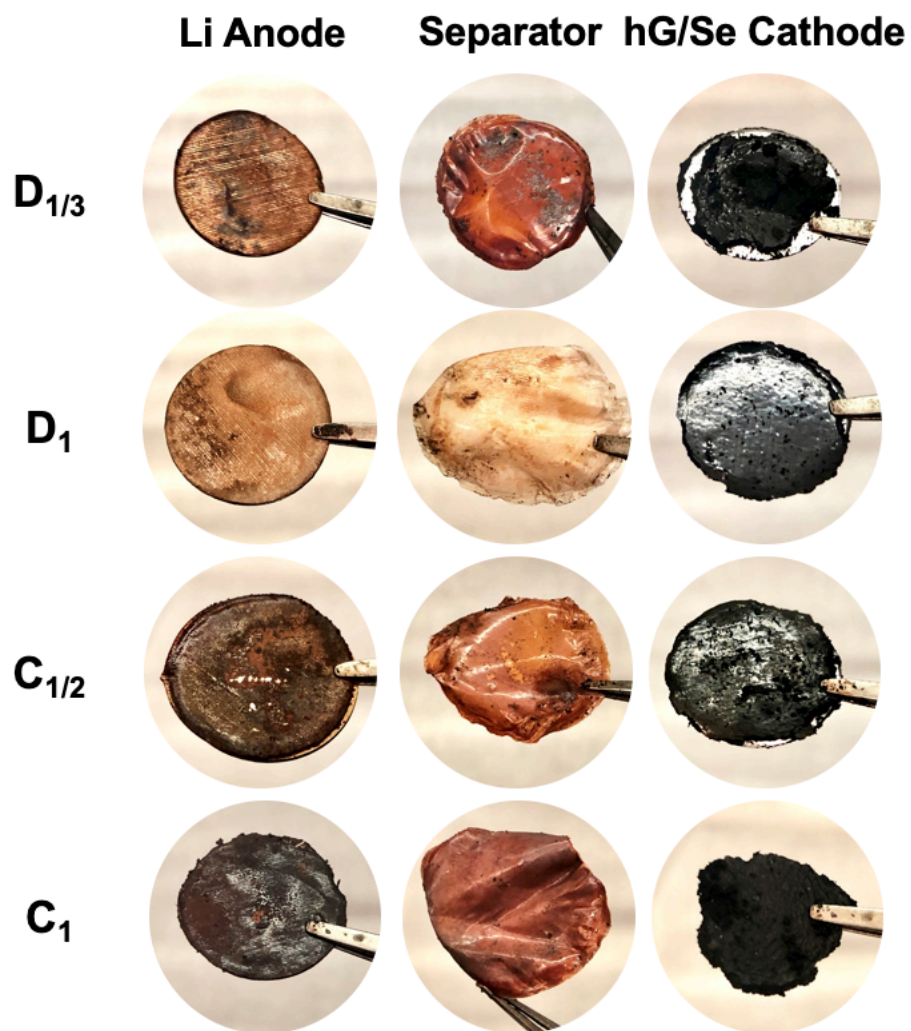

**Figure S6.** Photographs of post-mortem Li anodes, separators, and the hG/Se cathodes of identical Li-Se batteries with the hG/Se/hG sandwich cathode ( $m_{\text{Se}} = 17.3 \text{ mg/cm}^2$ , Se%  $\sim 75$  wt%) that were discharged or charged to different extents at  $1 \text{ mA/cm}^2$ .



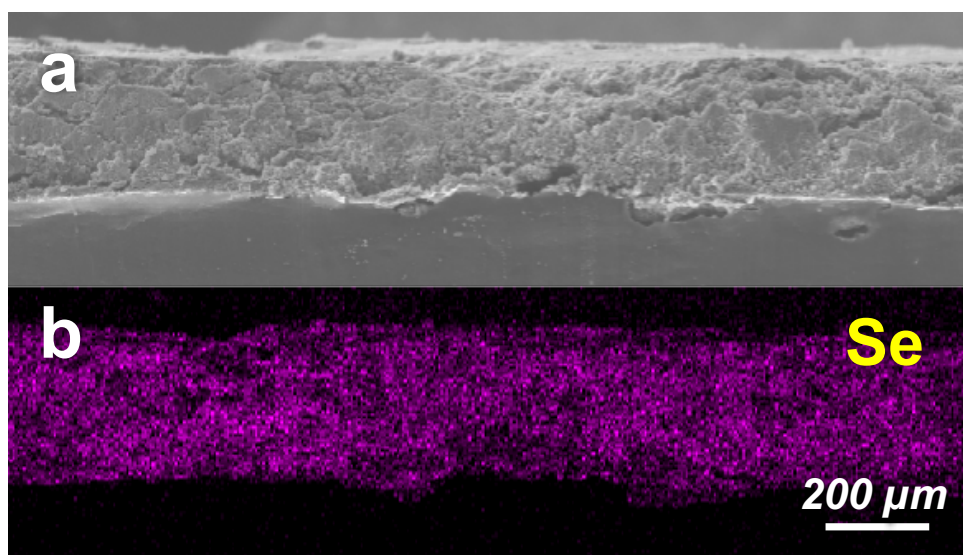

**Figure S7.** (a) Post-mortem SEM image and (b) the corresponding Se map from EDS mapping of the cathode cross-section, originally in hG/Se/hG sandwich architecture ( $m_{\text{Se}} = 17.3 \text{ mg/cm}^2$ , Se%  $\sim 75 \text{ wt\%}$ ), from a Li-Se batteries that were run for  $> 200$  cycles at  $1 \text{ mA/cm}^2$ .



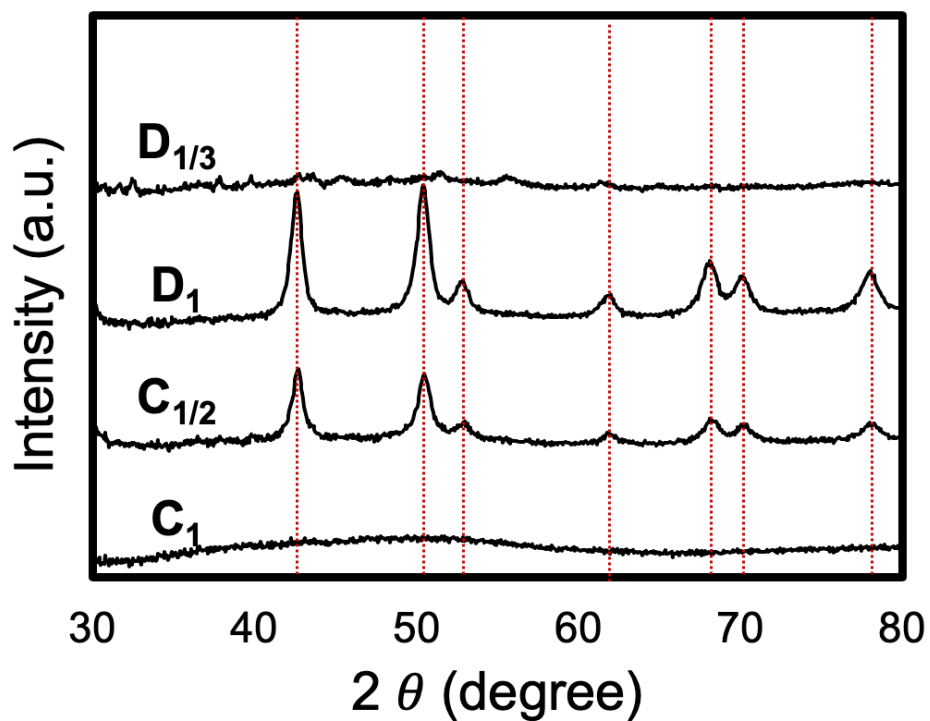

**Figure S8.** Post-mortem XRD patterns of various cathodes, originally in hG/Se/hG sandwich architecture ( $m_{\text{Se}} = 17.3 \text{ mg/cm}^2$ , Se%  $\sim 75 \text{ wt\%}$ ), from identical Li-Se batteries that were discharged or charged to different extents at  $1 \text{ mA/cm}^2$ .

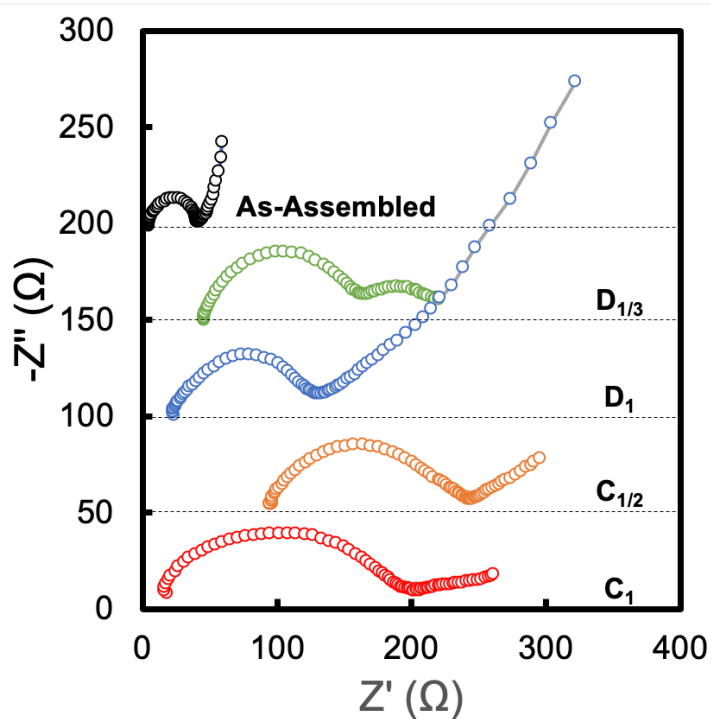

**Figure S9.** Post-mortem Nyquist plots from EIS measurements of various identical Li-Se batteries with originally hG/Se/hG sandwich cathodes ( $m_{\text{Se}} = 17.3 \text{ mg/cm}^2$ ,  $\text{Se}\% \sim 75 \text{ wt}\%$ ) that were discharged or charged to different extents at  $1 \text{ mA/cm}^2$ . The Nyquist plot from an as-assembled cell (the same shown in Figure 2a) is also shown for comparison.

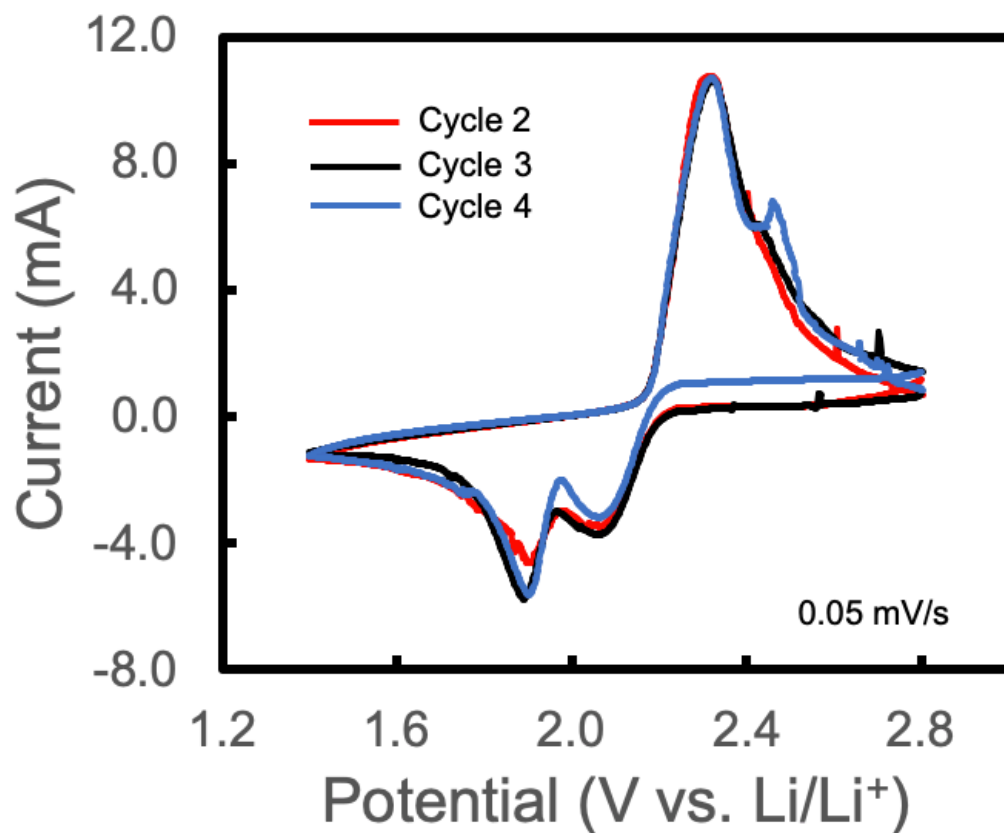

**Figure S10.** Cycles 2 – 4 of the CV measurements for a Li-Se battery with hG/Se/hG sandwich cathode ( $m_{\text{Se}} = 17.3 \text{ mg/cm}^2$ ,  $\text{Se}\% \sim 75 \text{ wt}\%$ ) at a scan rate of 0.05 mV/s with voltage limits of 1.4 (cathodic) and 2.8 V (anodic), respectively. These cycles were following Cycle 1 shown in Figure 2b.

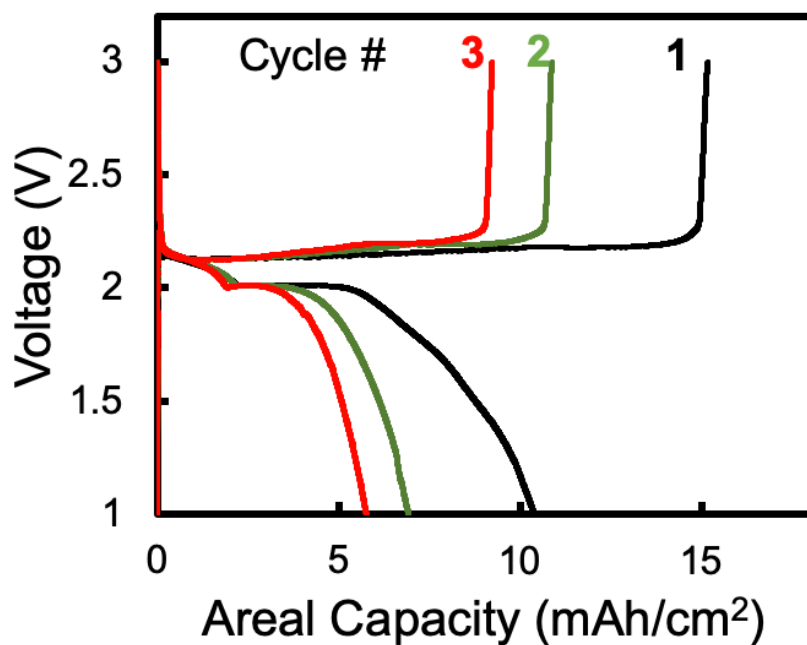

**Figure S11.** The first 3 cycles of a Li-Se battery with hG/Se/hG cathode ( $m_{\text{Se}} = 17.3 \text{ mg/cm}^2$ , Se%  $\sim 75 \text{ wt\%}$ ) at a current density of  $0.5 \text{ mA/cm}^2$ . The cycle 1 data is identical to that shown in Figure 2c.

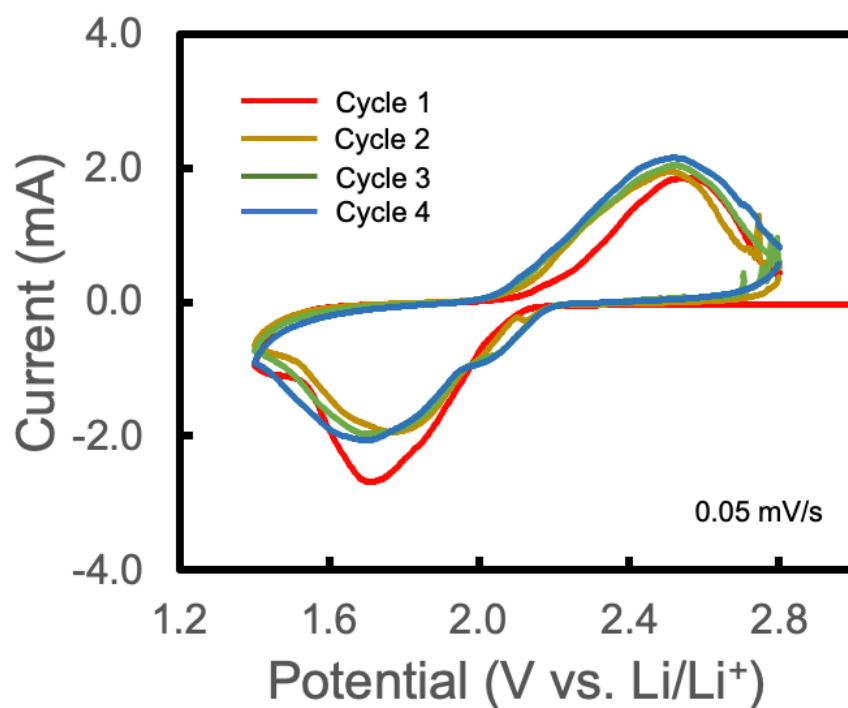

**Figure S12.** The first 4 cycles of the CV measurement for a Li-Se battery with hG/Se/hG sandwich cathode ( $m_{\text{Se}} = 17.3 \text{ mg/cm}^2$ ,  $\text{Se}\% \sim 75 \text{ wt}\%$ ) and TTE/DOL (1:1, v/v) as the electrolyte solvent. The scan rate was 0.05 mV/s; voltage limits were 1.4 (cathodic) and 2.8 V (anodic), respectively.

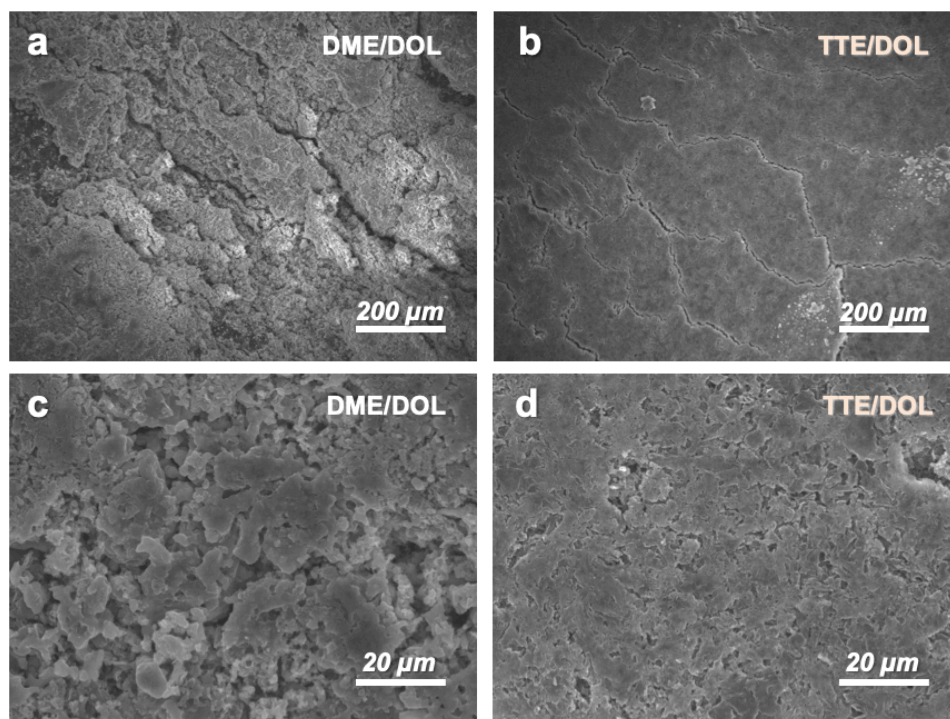

**Figure S13.** SEM images at (a,b) lower and (c,d) higher magnifications of post-mortem Li anode surfaces of Li-Se batteries with hG/Se/hG sandwich electrodes ( $m_{\text{Se}} = 17.3 \text{ mg/cm}^2$ ,  $\text{Se}\% \sim 75 \text{ wt}\%$ ) after prolonged cycling ( $> 80$  cycles). The electrolyte solvents were (a,c) DME/DOL (1:1, v/v) and (b,d) TTE/DOL (1:1, v/v), respectively.

**Table S1.** Overall and layer density values ( $\text{g}/\text{cm}^3$ ) of the sandwich discs measured via SEM. Density values of the neat active materials provided by the vendor (Sigma-Aldrich) are also listed for comparison.

|                       | hG/Se/hG | hG/S/hG | hG/SeS <sub>2</sub> /hG |
|-----------------------|----------|---------|-------------------------|
| Overall               | 2.31     | 1.46    | 2.09                    |
| hG Layer              | 1.09     | 0.81    | 0.97                    |
| Active Material Layer | 3.68     | 2       | 3.41                    |
| Neat Active Material  | 4.81     | 2.07    | N/A                     |



**Table S2.** A literature survey (ordered roughly by date of publication) of available capacity values of various Se composite cathodes with Se mass loadings of  $> 3 \text{ mg/cm}^2$  in comparison to those in this work. Blue-shaded entries are those with high Se mass loadings of  $> 10 \text{ mg/cm}^2$ .

| Cathode Scaffold                             | Se Incorporation Method             | Se Cathode Preparation | Se Content (%) | Se Mass Loading ( $\text{mg/cm}^2$ ) | Current Density ( $\text{mA/cm}^2$ ) or [C-Rate] | Specific Capacity ( $\text{mAh/g}_{\text{Se}}$ ) | Areal Capacity ( $\text{mAh/cm}^2$ ) | Electrolyte Base                | Ref.      |
|----------------------------------------------|-------------------------------------|------------------------|----------------|--------------------------------------|--------------------------------------------------|--------------------------------------------------|--------------------------------------|---------------------------------|-----------|
| Holey Graphene                               | Physical Sandwich with a Neat Layer | Dry Press              | 75             | 17.3                                 | 0.5/1/2/5                                        | 598.4/316.2/289.1/221.3                          | 10.35/5.47/5.0/3.83                  | Ether (DME/DOL)                 | This Work |
|                                              |                                     |                        |                |                                      | 0.5/1/2/5                                        | 466.7/288.6/154.3/38.10/                         | 8.07/4.99/2.67/0.66                  | Fluorinated Ether (TTE/DOL)     |           |
| 3DPSe                                        | Melt-Diffusion                      | 3D Printed             | 48.2           | 4                                    | 0.5/1/2/3/5/8/10                                 | 657.7/568.3/ 531/512.4/ 485.1/441.6/401.9        | 2.63/2.27/2.12/2.05/1.94/1.77/1.61   | Gel-Polymer                     | [S1]      |
|                                              |                                     |                        |                | 20                                   |                                                  | 580/540/500/470/420/330/270                      | 11.6/10.8/10/9.4/8.7/6.6/5.4         |                                 |           |
| Covalent Organic Framework                   | High-Speed Dispersion               | Slurry Casting         | 80             | $\sim 3$                             | [6C/20C]                                         | 126/51                                           | 0.37/0.153                           | Ether (DME/DOL)                 | [S2]      |
| Multilayer CNF                               | Syringe-Filtration                  | Syringe-Filtration     | 63.5           | 4.5/6.75                             | 0.22/0.34                                        | 795/818                                          | 3.6/5.5                              | Ether (DME/DOL)                 | [S3]      |
|                                              |                                     |                        |                | 9.0/13.5                             | 0.45/0.675                                       | 722/667                                          | 6.5/9.0                              |                                 |           |
| ARC-SiOC                                     | Melt-Diffusion                      | Slurry Casting         | 51.2           | 4/6                                  | [0.1C]                                           | 850/616.6                                        | 3.4/3.7                              | Carbonate                       | [S4]      |
|                                              |                                     |                        |                | 8/10                                 |                                                  | 600/350                                          | 4.8/3.5                              |                                 |           |
| A4-Carbon Microspheres                       | Melt-Diffusion                      | Slurry Casting         | 60             | 3.2                                  | 1.6                                              | 513                                              | 1.64                                 | Carbonate                       | [S5]      |
| N,S Co-Doped Graphene Membrane               | Solution Mix                        | Catholyte              | N/A            | $\sim 5$                             | [0.5C/1C/2C/4C]                                  | 534.6/473.5/348.6/301.4                          | 2.673/2.367/1.743/1.507              | $\text{Li}_2\text{Se}$ Solution | [S6]      |
| Dual-Doped Hierarchical Porous Carbon Matrix | Melt-Diffusion                      | Slurry Casting         | $\sim 48$      | 3                                    | N/A                                              | 280                                              | 0.84                                 | Carbonate                       | [S7]      |
| PANI Coated Carbon Black                     | Melt-Diffusion                      | Slurry Casting         | 51.9           | 2-3                                  | 3.4/5.06/8.4 [2C/3C/5C]                          | 529.2/514.2/475.6                                | 1.3/1.29/1.19                        | Carbonate                       | [S8]      |
| Nano-Cellulose Derived Monolithic Carbon     | melt-Infiltration                   | Slurry Casting         | 70             | 6.64                                 | [0.1C]                                           | 620                                              | 4.12                                 | Carbonate                       | [S9]      |
| CNTs                                         | Pressure-Induced Melt-Diffusion     | Slurry Casting         | 85             | 5–10                                 | 0.2C/0.5C/1C/2C                                  | 333/231/153/100                                  | 2.5/1.73/1.15/0.75                   | Ether (DME/DOL)                 | [S10]     |
| G-SeHMs                                      | Graphene Oxide /Se suspension       | Slurry Casting         | 80             | 2–3                                  | 0.17/8.43 [0.1C/5C]                              | 514/241                                          | 1.285/0.6                            | Ether (TEGDME/DOL)              | [S11]     |
| Macro-/Micro-Porous Biochar-Based Framework  | Melt-Diffusion                      | Slurry Casting         | 56.1           | $2.9 \pm 0.2$                        | [0.2C]                                           | 466.8                                            | 1.35                                 | Carbonate                       | [S12]     |

|                              |                |                |       |     |                      |                    |                    |                 |       |
|------------------------------|----------------|----------------|-------|-----|----------------------|--------------------|--------------------|-----------------|-------|
| Multi-Walled Carbon Nanotube | Solution Mix   | Slurry Casting | 60.83 | 3.6 | 1.21/2.43 /4.86/9.72 | ~680/580/500/358.2 | 2.45/2.09/1.8/1.29 | Ether (DME/DOL) | [S13] |
| Se                           | --             | Slurry Casting | 70    | 4   | 2.7 [0.5C]           | 546                | 2.18               | Ether (DME/DOL) | [S14] |
| Porous Hollow Carbon Bubbles | Melt-Diffusion | Slurry Casting | 48    | 3-4 | [0.1C/0.2C/0.5C/1C]  | 600/525/465/425    | 2.1/1.84/1.63/1.49 | Carbonate       | [S15] |

## References:

- [S1] Gao, X.; Yang, X.; Wang, S.; Sun, Q.; Zhao, C.; Li, X.; Liang, J.; Zheng, M.; Zhao, Y.; Wang, J.; Li, M.; Li, R.; Sham, T.-K.; Sun, X. A 3D-printed ultra-high Se loading cathode for high energy density quasi-solid-state Li–Se batteries. *J. Mater. Chem. A* **2020**, *8*, 278-286.
- [S2] Si, L.; Wang, J.; Li, G.; Hong, X.; Wei, Q.; Yang, Y.; Zhang, M.; Cai, Y. High energy density lithium-selenium batteries enabled by a covalent organic framework-coated separator *Mater. Lett.* **2019**, *246*, 144-148.
- [S3] Xia, Y.; Lu, C.; Fang, R.; Huang, H.; Gan, Y.; Liang, C.; Zhang, J.; He, X.; Zhang, W. Freestanding layer-structure selenium cathodes with ultrahigh Se loading for high areal capacity Li-Se batteries. *Electrochem. Commun.* **2019**, *99*, 16-21.
- [S4] Fang, R.; Xia, Y.; Liang, C.; He, X.; Huang, H.; Gan, Y.; Zhang, J.; Tao, X.; Zhang, W. Supercritical CO<sub>2</sub>-assisted synthesis of 3D porous SiOC/Se cathode for ultrahigh areal capacity and long cycle life Li–Se batteries. *J. Mater. Chem. A* **2018**, *6*, 24773-24782.
- [S5] Park, G. D.; Kim, J. H.; Lee, J.-K.; Kang, Y. C. Carbon microspheres with well-developed micro- and mesopores as excellent selenium host materials for lithium–selenium batteries with superior performances. *J. Mater. Chem. A* **2018**, *6*, 21410-21418.
- [S6] Gu, X.; Xin, L.; Li, Y.; Dong, F.; Fu, M.; Hou, Y. Highly reversible Li–Se batteries with ultra-lightweight N,S-codoped graphene blocking layer. *Nano-Micro Lett.* **2018**, *10*, 59.
- [S7] Zhao, X.; Yin, L.; Zhang, T.; Zhang, M.; Fang, Z.; Wang, C.; Wei, Y.; Chen, G.; Zhang, D.; Sun, Z.; Li, F. Heteroatoms dual-doped hierarchical porous carbon-selenium composite for durable Li–Se and Na–Se batteries. *Nano Energy* **2018**, *49*, 137.
- [S8] Wang, B.; Zhang, J.; Xia, Z.; Fan, M.; Lv, C.; Tian, G.; Li, X. Polyaniline-coated selenium/carbon composites encapsulated in graphene as efficient cathodes for Li-Se batteries *Nano Res.* **2018**, *11*, 2460-2469.
- [S9] Ding, J.; Zhou, H.; Zhang, H.; Tong, L.; Mitlin, D. Selenium impregnated monolithic carbons as free-standing cathodes for high volumetric energy lithium and sodium metal batteries. *Adv. Energy Mater.* **2017**, *8*, 1701918.
- [S10] Dutta, D.; Gope, S.; Negi, D. S.; Datta, R.; Sood, A. K.; Bhattacharyya, A. J. Pressure-induced capillary encapsulation protocol for ultrahigh loading of sulfur and selenium inside

carbon nanotubes: Application as high-performance cathode in Li–S/Se rechargeable batteries. *J. Phys. Chem. C* **2016**, *120*, 51,29011-29022.

[S11] Youn, H.-C.; Jeong, J. H.; Roh, K. C.; Kim, K.-B. Graphene–selenium hybrid microballs as cathode materials for high-performance lithium–selenium secondary battery applications. *Sci. Rep.* **2016**, *6*, 30865.

[S12] Zhang, H.; Yu, F.; Kang, W.; Shen, Q. Encapsulating selenium into macro-/micro-porous biochar-based framework for high-performance lithium-selenium batteries. *Carbon* **2015**, *95*, 354-363.

[S13] Wang, X.; Zhang, Z.; Qu, Y.; Wang, G.; Lai, Y.; Li, J. Solution-based synthesis of multi-walled carbon nanotube/selenium composites for high performance lithium–selenium battery. *J. Power Sources* **2015**, *287*, 247-252.

[S14] Fang, R.; Zhou, G.; Pei, S.; Li, F. Cheng, H.-M. Localized polyselenides in a graphene-coated polymer separator for high rate and ultralong life lithium–selenium batteries. *Chem. Commun.* **2015**, *51*, 3667-3670.

[S15] Zhang, J.; Fan, L.; Zhu, Y.; Xu, Y.; Liang, J.; Wei, D.; Qian, Y. Selenium/interconnected porous hollow carbon bubbles composites as the cathodes of Li–Se batteries with high performance. *Nanoscale* **2014**, *6*, 12952-12957.
